# Supplementary material for: Ertugliflozin and Sitagliptin Co-initiation in Patients with Type 2 Diabetes: The VERTIS SITA Randomized Study
Source: PubMed Central journal article supplement — Diabetes Ther. 2018 Jan 8;9(1):253–68. doi: 10.1007/s13300-017-0358-0 (PMC5801244; doi:10.1007/s13300-017-0358-0), 2018-01-08
Supplement: 13300_2017_358_MOESM1_ESM.pdf [file 13300_2017_358_MOESM1_ESM.pdf]

## Supplementary Materials

### List of investigators in ertugliflozin study MK-8835-017

**USA:** John Gabriel, Ted Melliza, Matthew Vela (North Richland Hills, TX); Sam Miller, Rodney Carry (San Antonio, TX); Juan Frias, Stanley Hsia, Sharon Kelly (Los Angeles, CA); David Sandercock, Melissa Kite, Gordon Hill, Clifford Alprin, Walter Walthall (San Antonio, TX); Mario Belledonne (Rockville, MD); Hugo Toro, Amy Megerle, Linda Lin, Miguel Posada (Katy, TX); Audrey Lacour, Linda Lin, Miguel Posada, Alondra Martinez, Rosibel Bustamante, Gilma Martinez (Houston, TX); Baudilio Cusco-Prieto, Virginia Viera (Coral Gables, FL); Rafael Chiong, Mario Jimenez, Sara Llerena (Miami, FL); Cara Dawson (Denver, CO); Eveline Padilla (Hialeah, FL); Jonathan Wise, Howard Miller (Metairie, LA); Michael Seep, William Nabours (Lake Charles, LA); Andrea Lawless, Kathleen Kelley (Addison, IL); Juan Salinas, Lilia Rodríguez Ables, Lilia Rodriguez Ables, Josefina Tur (Miami, FL); Tira Chaicha-Brom, Brandy Wellmon, Lindsay Harrison (Austin, TX); Michael Winnie, Lisa Blair (Corpus Christi, TX); Elias Kolettis, Leonard Dunn, Lynne Merriam, Amy Howard, Melonie Tournai (Clearwater, FL); Mikhail Palatnik, Phillip Ford, Ashley Winters, Diane Battaglia, Kayvan Haddadan, Teri Nguyen, Eric Hanson, Mark Alger (Gold River); Jorge Posada, Alejandro Pla, Carla Vera (Miami Lakes, FL); Eduardo Viera, Roberto Fernandez (Hialeah, FL); Benny Green, Pamela Bariola, Kymberly Amyett (Little Rock, AR); Larry Reed, Keisha Bishop, Brian Springer (Hazelwood, MO); Thomas Ballard, William Byars, Ronald Mayfield, Nancy Durham, Ruth Wood (Greer, SC); Bruce Jackson (Redondo Beach, CA); Jeffrey Klein, Margaret Rhee, Stephanie Wojtowicz, Annette Pangle, Sandra Smith, Stacy Merlitti (Akron, OH); Patricia Buchanan, Douglas Bailey, Dirk deBroekert, Randie Fletcher (Eugene, OR);

Charles Sharpe, Wallace Burroughs (Athens, TN); Debra Weinstein, Reina Mendelson (Boynton Beach, FL); Richard Jackson, Damian Covington (Richmond, VA); Alan Miller, Todd Miller (Dunwoody, GA); Sanjay Vora, Craig Thompson, Marc Comianos (Marion, OH); Ramesh Gupta, Malini Gupta-Ganguli (Memphis, TN); Richard Krause, Andrea Galloway, Rebekah Corey, Brandy Biederman (Chattanooga, TN); Peter Gagianas, Dawnmarie Minyon-Sarver, Anthony Ciampa, John Barrett (McMurray, PA); Deanna Cheung, Leigh Tao, Stephen Zukotynski (Long Beach, CA); David Headley, Jennifer Grear (Port Gibson, MS); Raul Gaona, M. Antonieta Gonzalez (San Antonio, TX); Jack Rosenfeld, Jennifer Craig, Barry Green, William Lee (Lansdale, PA); Carlos Herrera, Samuel Rivera, Robyn Wilson, Ethelina Menchaca (Houston, TX); Douglas Young, Gary Carson, Robin Collins, Narinder Dhaliwal (Sacramento, CA); Rabi Sinha, Grace Silverio (Hopewell Junction, NY); Kaushik Amin (Conyers, GA); Clinton Corder, Cheryl Black (Oklahoma City, OK); Val Hansen, Joseph Jensen (Bountiful, UT); Anthony Captain, Kent Van Arsdell (Calhoun, GA); Stanley Hsia, Juan Frias, Robert Jenders, Sharon Kelly (Huntington Park, CA). **Czech Republic:** Milan Kvapil, Eva Dvorakova, Dagmar Bartaskova, Klaudia Halova Karoliova (Praha); Tomas Brychta, Svetlana Brychtova (Olomouc); Michala Pelikanova, Drahomira Gulakova (Praha); Andrea Gamova, Emilia Malicherova, Eva Roderova, Emilia Malicherova, Petra Jenickova, Karolina Travova (Praha); Petr Maule, Pavla Smejkalova (Humpolec); Juraj Divinec, Zdenek Divis (Pardubice); Richard Zachoval, Danuse Kucerova (Jicin); Dagmar Bartaskova, Jakub Hron (Praha). **Hungary:** Gyöngyi Csécsei, Andrea Filo, Judit Ferenczi, Ildiko Ferencz, Eva Somos, Hortenzia Karolyi, Eva Mihaly, Zsolt Papp (Budapest); Marianna Zsom, Balazs Nyiri, Gabriella Szaboki (Baja); Éva Péterfai, Katalin Bezzegh, Vendel Kemeny, Eniko Kulcsar, Botond Literati Nagy, Jozsef Pauer,

Barbara Buday (Balatonfüred); Peter Danos, Janos Kis, Eleonóra Beke, Andrea Grosz (Budapest); Zsolt Zilahi, Andrea Nagy (Nyregyhza). **Israel:** Julio Wainstein Maya Ish Shalom (Tel Aviv); Deeb Daoud, Irit Hochberg, Sagit Zolotov, Moshe Zloczower, Elena Segal (Haifa). **United Kingdom:** Mark Blagden, Jahanzeb Ali (Chesterfield); Charles Bundy, Karamjeet Bimbh, Stephen Locke (Trowbridge); Richard Gaunt, Gavin Durrant, Alistair McKibbin (Chippenham); Venkata Kondagunta, Judith Mackay, Devinda Weeraratne, Daniela Hristova (Reading); Paul Ivan, Essam Eldin Ahmed Abdulhakim, Susannah Eyre (Liverpool); Fiona Douglas (Hexham); Hawys Thomas, Maria Rita Charters (Cardiff); Surabhi Gunput, Giuseppe Fiore Paul Ivan, Tomas Ko (Chorley); Helen Timmis, Mohamed Okily, Mohamed Okily, Madhu Venkate Gowda (Manchester); Amit Mathew, Babatunde Oyesile, Anton Poterajlo (Edgbaston); Veronika Horvathova, Imrozia Arif, Devinda Weeraratne, Imrozia Arif, Anthony Avornyo (Glasgow). **Ukraine:** Halyna Myshanych, Tetiana Zalievska, Oleh Myshanych, Nataliya Bazhenova, Svitlana Samoilo, Yaroslav Kleban (Kyiv); Inna Sorokina, Oleksandra Donets, Svitlana Postol, Ievgeniia Tokareva, Oleksandra Bilotkach (Kyiv). **Bulgaria:** Emiliya Apostolova, Momchil Hubchev (Smolyan); Georgi Levterov, Katya Doykova, Milen Yosifov (Plovdiv); Nadezhda Ivanova Mendizova, Vladimir Vasilev (Sofia). **Serbia:** Nebojsa Lalic, Aleksandra Jotic, Ljiljana Lukic, Tanja Milicic, Marija Macesic, Jelena Seferovic, Milica Prostran, Jelena Stanarcic Gajovic (Belgrade); Dragan Micic, Aleksandra Kendereski, Goran Cvijovic, Snezana Polovina, Milica Prostran (Belgrade); Katarina Lalic, Natasa Rajkovic, Ljiljana Popovic, Sandra Singh, Ljubica Stosic, Milica Prostran (Belgrade); Dragan Dimic; Milena Velojic-Golubovic (Nis); Milica Pesic, Danijela Radojkovic, Sonja Kostic (Nis); Slobodan Antic, Danijela Stojic (Nis); Edita Stokic, Bojan Vukovic, Jovanka Novakovic-Paro, Branka Kovacev-

Zavisić, Slobodan Mijačević (Novi Sad); Aleksandar Djukić, Jelena Petrović, Violeta Mladenović, Dragana Bubanja (Kragujevac). **Croatia:** Srećko Tušek, Nedjeljko Ciglenceki (Toplice); Lea Smirčić Duvnjak, Dragica Soldo, Anica Badanjak, Tomislav Božek (Zagreb); Zeljka Crncević-Orlić, Nina Poropat (Rijeka); Dario Rahečić, Petra Melis (Zagreb); Silvija Čanečki-Varžić, Vedrana Baraban (Osijek). **Estonia:** Kaja Martsin, Olga Basulina (Tallinn); Kaia Kiiroja, Margit Venesaar (Tallinn); Riin Lanno, Elina Šel'pakova, Mare Vilberg (Tallinn); Kaja Arbeiter, Mirjam Turkson (Tallinn); Ingrid Alt, Kulli Paju (Paide).

**Supplementary Table S1** Glycated hemoglobin (HbA1c) distribution at baseline and subgroup efficacy analysis (change in HbA1c from baseline at week 26 per baseline HbA1c)

|                                                                    | <b>Placebo</b>      | <b>E5/S100</b>       | <b>E15/S100</b>      |
|--------------------------------------------------------------------|---------------------|----------------------|----------------------|
| Baseline HbA1c ≤ median HbA1c (9.0% [75 mmol/mol])                 | <b>n = 46</b>       | <b>n = 53</b>        | <b>n = 49</b>        |
| HbA1c distribution at baseline, % (mmol/mol)                       | 8.3 (67.0)          | 8.3 (67.2)           | 8.3 (67.7)           |
| LS mean change from baseline at week 26, % (95% CI)                | -0.0 (-0.4, 0.3)    | -1.4 (-1.7, -1.1)    | -1.3 (-1.6, -1.0)    |
| <i>LS mean change from baseline at week 26, mmol/mol (95% CI)</i>  | -0.3 (-3.9, 3.3)    | -15.5 (-18.6, -12.4) | -14.2 (-17.4, -11.0) |
| Difference in LS mean change vs. placebo, % (95% CI)               | -                   | -1.4 (-1.8, -1.0)    | -1.3 (-1.7, -0.8)    |
| <i>Difference in LS mean change vs. placebo, mmol/mol (95% CI)</i> | -                   | -15.2 (-20.0, -10.5) | -13.9 (-18.7, -9.1)  |
| Baseline HbA1c > median HbA1c (9.0% [75 mmol/mol])                 | <b>n = 39</b>       | <b>n = 44</b>        | <b>n = 43</b>        |
| HbA1c distribution at baseline, % (mmol/mol)                       | 9.8 (83.1)          | 9.6 (81.8)           | 9.8 (83.1)           |
| LS mean change from baseline at week 26, % (95% CI)                | -1.0 (-1.4, -0.6)   | -1.8 (-2.1, -1.5)    | -2.2 (-2.5, -1.9)    |
| <i>LS mean change from baseline at week 26, mmol/mol (95% CI)</i>  | -10.9 (-15.0, -6.7) | -19.7 (-23.2, -16.2) | -24.3 (-27.8, -20.8) |
| Difference in LS mean change vs. placebo, % (95% CI)               | -                   | -0.8 (-1.3, -0.3)    | -1.2 (-1.7, -0.7)    |
| <i>Difference in LS mean change vs. placebo, mmol/mol (95% CI)</i> | -                   | -8.9 (-14.3, -3.4)   | -13.4 (-18.8, -8.0)  |

*CI* confidence interval *E* ertugliflozin *LS* least squares *S* sitagliptin

**Supplementary Table 2** Additional secondary efficacy endpoints at week 26<sup>a</sup>

|                                                                  | Placebo           | E5/S100                       | E15/S100                       |
|------------------------------------------------------------------|-------------------|-------------------------------|--------------------------------|
| Glycemic rescue medication                                       | <i>n</i> = 97     | <i>n</i> = 98                 | <i>n</i> = 96                  |
| Number of patients, <i>n</i> (%)                                 | 31 (32.0)         | 6 (6.1) <sup>b</sup>          | 0 (0.0) <sup>b</sup>           |
| HOMA-β, %                                                        | <i>n</i> = 90     | <i>n</i> = 97                 | <i>n</i> = 96                  |
| LS mean change from baseline (95% CI)                            | 4.1 (−1.7, 10.0)  | 20.6 (15.7, 25.5)             | 24.3 (19.4, 29.1)              |
| Pairwise comparison vs. placebo, difference in LS means (95% CI) | –                 | 16.5 (9.1, 23.9) <sup>b</sup> | 20.1 (12.7, 27.6) <sup>b</sup> |
| Insulinogenic index, ng/mL per mg/dL                             | <i>n</i> = 90     | <i>n</i> = 97                 | <i>n</i> = 95                  |
| LS mean change from baseline (95% CI)                            | 0.0 (−0.02, 0.03) | 0.02 (0.00, 0.04)             | 0.03 (0.01, 0.05)              |
| Pairwise comparison vs. placebo, difference in LS means (95% CI) | –                 | 0.02 (−0.01, 0.05)            | 0.03 (−0.00, 0.06)             |
| Patients with HbA1c <6.5% (<48 mmol/mol)                         | <i>n</i> = 96     | <i>n</i> = 98                 | <i>n</i> = 96                  |
| Number of patients, <i>n</i> (%)                                 | 4 (4.2)           | 25 (25.5)                     | 17 (17.7)                      |
| Adjusted odds ratio relative to placebo (95% CI)                 | –                 | 12.3 (3.2, 46.9) <sup>b</sup> | 8.1 (2.1, 31.1) <sup>c</sup>   |

<sup>a</sup>These secondary efficacy analyses were not included in the ordered testing procedure and nominal *p* values are provided for descriptive purposes only; <sup>b</sup>*p* < 0.001 vs.

placebo; <sup>c</sup>*p* = 0.002 vs. placebo. *CI* confidence interval *E* ertugliflozin *HbA1c* glycated hemoglobin *HOMA-β* homeostasis model assessment of β-cell function *LS* least squares *S* sitagliptin.

**Supplementary Table S3** Percent change in low-density lipoprotein cholesterol (LDL-C) and high-density lipoprotein cholesterol (HDL-C) from baseline at week 26

|                                                                  | <b>Placebo</b>  | <b>E5/S100</b>   | <b>E15/S100</b>  |
|------------------------------------------------------------------|-----------------|------------------|------------------|
| <b>LDL-C</b>                                                     | <i>n</i> = 68   | <i>n</i> = 86    | <i>n</i> = 86    |
| LS mean percent change from baseline (95% CI)                    | 2.9 (−3.5, 9.2) | 10.6 (4.9, 16.3) | 10.1 (4.4, 15.8) |
| Pairwise comparison vs. placebo, difference in LS means (95% CI) | –               | 7.7 (−0.6, 16.1) | 7.2 (−1.1, 15.6) |
| <b>HDL-C</b>                                                     | <i>n</i> = 68   | <i>n</i> = 86    | <i>n</i> = 88    |
| LS mean percent change from baseline (95% CI)                    | 3.6 (−0.3, 7.5) | 9.3 (5.8, 12.7)  | 8.2 (4.8, 11.6)  |
| Pairwise comparison vs. placebo, difference in LS means (95% CI) | –               | 5.7 (0.5, 10.9)  | 4.6 (−0.5, 9.8)  |

*CI* confidence interval *E* ertugliflozin *LS* least squares *S* sitagliptin

## Supplementary Fig. S1 Patient disposition

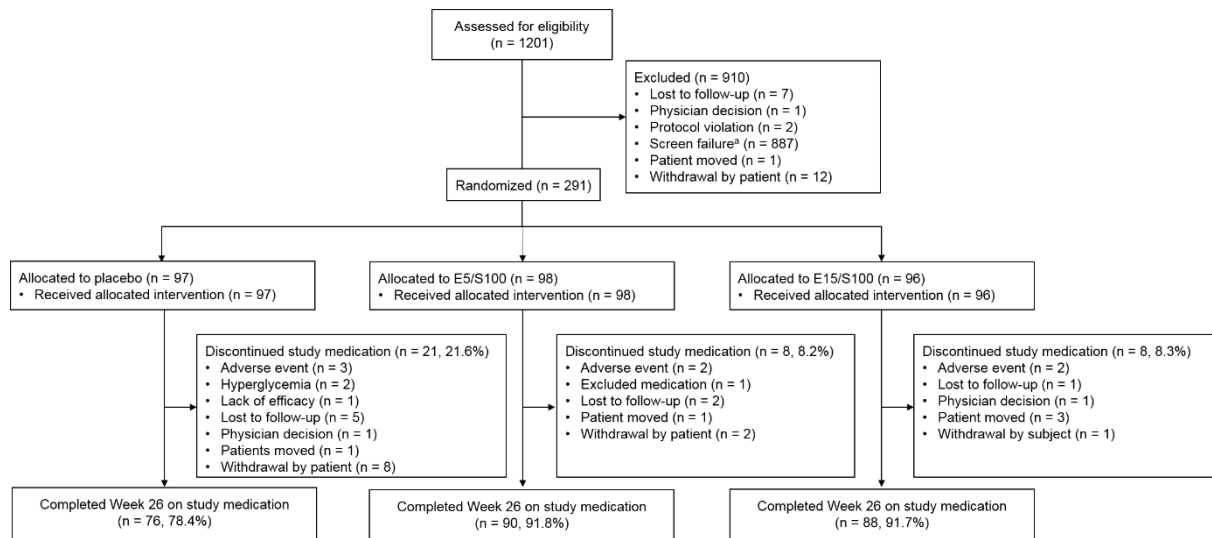

### E ertugliflozin S sitagliptin

<sup>a</sup>The most common reasons for screen failure were not meeting the inclusion criteria for HbA1c at Visit 1 relative to a patient's category of background diabetes therapy, and having exclusionary laboratory values.
